# Supplementary material for: Characterization of Salmonella Phage P1-CTX and the Potential Mechanism Underlying the Acquisition of the blaCTX-M-27 Gene
Source: MDPI journal article supplement (doi:10.3390/antibiotics13050446), 2024-05-14
Supplement: s1 [file s1]

Table S1 Characteristics of P1 phage carrying antibiotic resistance gene

| Name      | GenBank No. | Strain                  | Location  | Source       | Size (kb) | Antibiotic resistance gene                                                                                                               | Plasmid type | Mobile elements connect with P1 phage | Gene loci in P1 phage      |
|-----------|-------------|-------------------------|-----------|--------------|-----------|------------------------------------------------------------------------------------------------------------------------------------------|--------------|---------------------------------------|----------------------------|
| SJ46      | KU760857    | <i>Salmonella</i>       | China     | Pork         | 103.4     | <i>bla</i> <sub>CTX-M-27</sub>                                                                                                           | N/T          | Tn1721                                | <i>ref, mat</i>            |
| unnamed2  | CP031191    | <i>Salmonella</i>       | China     | Chicken      | 103.4     | <i>bla</i> <sub>CTX-M-27</sub>                                                                                                           | N/T          | Tn1721                                | <i>ref, mat</i>            |
| p14146    | CP064673    | <i>Salmonella</i>       | China     | Chicken meat | 103.4     | <i>bla</i> <sub>CTX-M-27</sub>                                                                                                           | N/T          | Tn1721                                | <i>ref, mat</i>            |
| p14076B   | CP064676    | <i>Salmonella</i>       | China     | Chicken meat | 103.4     | <i>bla</i> <sub>CTX-M-27</sub>                                                                                                           | N/T          | Tn1721                                | <i>ref, mat</i>            |
| JL22      | ON018986    | <i>Escherichia coli</i> | China     | Duck         | 99.6      | <i>bla</i> <sub>CTX-M-55</sub>                                                                                                           | N/T          | IS1380                                | <i>upfB</i>                |
| unnamed3  | CP041922    | <i>Escherichia coli</i> | China     | Sputum       | 94.6      | <i>bla</i> <sub>CTX-M-55</sub>                                                                                                           | N/T          | IS1380                                | <i>upfA</i>                |
| pEC5502-2 | CP092645    | <i>Escherichia coli</i> | China     | Urine        | 99.2      | <i>bla</i> <sub>CTX-M-55</sub>                                                                                                           | N/T          | ISKpn19, Tn3                          | <i>cin, lxr</i>            |
| pSCEC128  | MH844525    | <i>Escherichia coli</i> | China     | -            | 101.1     | <i>mcr-1</i>                                                                                                                             | N/T          | IS <i>AplI</i>                        | <i>ant1</i>                |
| p1-HYM1   | CP141766    | <i>Escherichia coli</i> | China     | Duck         | 96.1      | <i>mcr-1</i>                                                                                                                             | N/T          | IS <i>AplI</i>                        | <i>ant1</i>                |
| pTB-nb1   | CP033632    | <i>Escherichia coli</i> | China     | Chicken      | 147.4     | <i>sul1, aadA1, dfrA1, aph(6')-Id, aph(3'')-Ib, sul2, aac(3)-IId, aph(3')-IIa, oqxAB, bla</i> <sub>CTX-M-65</sub> , <i>fosA3, tet(A)</i> | IncHI2       | IS421, IS6                            | <i>gp21, phage protein</i> |
| pMB3176_1 | CP103719    | <i>Escherichia coli</i> | USA       | Blood        | 250.7     | <i>sul1, aadA5, dfrA17, bla</i> <sub>CTX-M-15</sub> , <i>bla</i> <sub>OXA-1</sub> , <i>aac(6')-Ib-cr5, tetR(B), tet(B), tet(C)</i>       | IncF         | ISEc45                                | <i>upfB</i>                |
| pTZ20_1P  | MN510447    | <i>Escherichia</i>      | Australia | Pig          | 130.1     | <i>dfrA12, aadA2, cmlA, aadA1, sul3, bla</i> <sub>TEM</sub>                                                                              | IncF         | IS26, Tn1721                          | <i>cin, pacA</i>           |

|                    |          |                                        |       |         |       |                                                                                                                                                                                 |        |     |            |
|--------------------|----------|----------------------------------------|-------|---------|-------|---------------------------------------------------------------------------------------------------------------------------------------------------------------------------------|--------|-----|------------|
| pFUJ80155-1<br>DNA | AP024695 | <i>coli</i><br><i>Escherichia coli</i> | Japan | Human   | 147.0 | <sup>1B</sup> , <i>aac(3)-IV</i> , <i>aph(4)-Ia</i><br><i>bla</i> <sub>TEM-1A</sub> , <i>sul3</i> , <i>cmlA1</i> , <i>tetX</i> , <i>aadA1</i> , <i>aadA2</i> ,<br><i>dfrA12</i> | IncFIB | Tn3 | <i>ref</i> |
| pCRKP-59-<br>KPC   | KX928752 | <i>Klebsiella pneumoniae</i>           | China | Patient | 216.9 | <i>qepA1</i> , <i>rmtB1</i> , <i>bla</i> <sub>TEM-1</sub> , <i>aac(3)-IIId</i> , <i>bla</i> <sub>KPC-2</sub> ,                                                                  | IncF   | IS6 | <i>gpU</i> |

N/T: not typeable; -: no information;
