# Supplementary material for: Characterization of Salmonella Phage P1-CTX and the Potential Mechanism Underlying the Acquisition of the blaCTX-M-27 Gene
Source: MDPI journal article supplement (doi:10.3390/antibiotics13050446), 2024-05-14
Supplement: s1 [file s1]

Table S2 The minimal inhibitory concentration (MIC) of 10 antibiotics of *Salmonella*  
J46

| Antibiotics                   | MIC(mg/L) | ½ MIC(mg/L) |
|-------------------------------|-----------|-------------|
| ciprofloxacin                 | 32        | 16          |
| gentamicin                    | 1         | 0.5         |
| amikacin                      | 8         | 4           |
| colistin                      | 1         | 0.5         |
| meropenem                     | 2         | 1           |
| trimethoprim-sulfamethoxazole | 32        | 16          |
| chloramphenicol               | 32        | 16          |
| kanamycin                     | 1024      | 512         |
| fosfomycin                    | 1         | 0.5         |
| cefotaxime                    | 128       | 64          |
